# Supplementary material for: Comparison of Gene and Protein Expressions in Rats Residing in Standard Cages with Those Having Access to an Exercise Wheel
Source: Hindawi journal article supplement (doi:10.1155/2014/950516), 2014-01-01
Supplement: f1 [file 950516.f1.pdf]

Supplementary Table 1. Protein – Peptide summary identification by spot number.

| Spot number    | MALDI well number | Match Quality | Top Ranked Protein Name (Species)                                                                           | Accession No. | Protein MW (kDa) | Protein pI | Peq.Count | Protein Score | Protein Score C. L. % | Total Ion Score | Total Ion C. L. % |
|----------------|-------------------|---------------|-------------------------------------------------------------------------------------------------------------|---------------|------------------|------------|-----------|---------------|-----------------------|-----------------|-------------------|
| 1              | C1                |               | Myosin-7 OS=Rattus norvegicus GN=Myh7 PE=2 SV=2                                                             | MYH7_RAT      | 222.945          | 5.6        | 31        | 168           | 100                   | 76              | 100               |
| 2              | C2                |               | myosin 2 [Rattus norvegicus]                                                                                | g 281308803   | 164.609          | 5.6        | 44        | 851           | 100                   | 577             | 100               |
| 3              | C3                |               | Alpha-1-inhibitor 3 OS=Rattus norvegicus GN=A1i3 PE=1 SV=1                                                  | A1I3_RAT      | 163.670          | 5.7        | 23        | 282           | 100                   | 201             | 100               |
| 5              | C4                |               | Myosin-binding protein C, cardiac-type OS=Rattus norvegicus GN=Mybpc3 PE=2 SV=2                             | MYPC_RAT      | 140.674          | 6.1        | 42        | 880           | 100                   | 583             | 100               |
| 6              | C5                |               | Myosin-binding protein C, cardiac-type OS=Rattus norvegicus GN=Mybpc3 PE=2 SV=2                             | MYPC_RAT      | 140.674          | 6.1        | 22        | 194           | 100                   | 116             | 100               |
| 7              | C6                |               | Myosin-6 OS=Rattus norvegicus GN=Myh6 PE=2 SV=2                                                             | MYH6_RAT      | 223.370          | 5.6        | 42        | 673           | 100                   | 487             | 100               |
| 9              | C7                |               | Mumagobulin-1 OS=Rattus norvegicus GN=Myg1 PE=2 SV=1                                                        | MUG1_RAT      | 165.221          | 5.7        | 24        | 543           | 100                   | 450             | 100               |
| 13             | C8                |               | Glycogen phosphorylase, brain form (Fragment) OS=Rattus norvegicus GN=Pygb PE=1 SV=3                        | PYGB_RAT      | 96.113           | 5.2        | 31        | 581           | 100                   | 360             | 100               |
| 15             | C9                |               | Glycogen phosphorylase, muscle form OS=Rattus norvegicus GN=Pygm PE=2 SV=5                                  | PYGM_RAT      | 97.212           | 6.9        | 29        | 497           | 100                   | 325             | 100               |
| 19             | C10               |               | Neurexophilin-4 OS=Rattus norvegicus GN=Nxph4 PE=2 SV=1                                                     | NXPH4_RAT     | 32.924           | 9.9        | 3         | 36            | 0                     | 28              | 92                |
| 23             | C11               |               | 78 kDa glucose-regulated protein OS=Rattus norvegicus GN=Hspa5 PE=1 SV=1                                    | GRP78_RAT     | 72.302           | 5.1        | 8         | 103           | 100                   | 82              | 100               |
| 26             | C12               |               | Heat shock cognate 71 kDa protein OS=Rattus norvegicus GN=Hspa71 PE=1 SV=1                                  | HSP70_RAT     | 70.827           | 5.4        | 19        | 399           | 100                   | 295             | 100               |
| 27             | C13               |               | Serum albumin OS=Rattus norvegicus GN=Ab PE=1 SV=2                                                          | ALBU_RAT      | 68.686           | 6.1        | 27        | 692           | 100                   | 530             | 100               |
| 28             | C14               |               | Serum albumin OS=Rattus norvegicus GN=Ab PE=1 SV=2                                                          | ALBU_RAT      | 68.686           | 6.1        | 26        | 770           | 100                   | 616             | 100               |
| 29             | C15               |               | T-kinogen 1 OS=Rattus norvegicus GN=Map1 PE=1 SV=2                                                          | KNT1_RAT      | 47.745           | 6.1        | 9         | 394           | 100                   | 354             | 100               |
| 33             | C16               |               | Phosphoglucosylase-1 OS=Rattus norvegicus GN=Pgm1 PE=1 SV=2                                                 | PGM1_RAT      | 61.385           | 5.3        | 20        | 247           | 100                   | 120             | 100               |
| 34             | C17               |               | Methylenetetrahydrofolate carboxylase subunit alpha, mitochondrial OS=Rattus norvegicus GN=Mccct1 PE=1 SV=4 | MCCA_RAT      | 79.279           | 6.7        | 12        | 80            | 100                   | 41              | 100               |
| 39             | C18               |               | Serine protease inhibitor A3K OS=Rattus norvegicus GN=SerpinA3 PE=1 SV=3                                    | SPAK3_RAT     | 46.532           | 5.3        | 13        | 430           | 100                   | 357             | 100               |
| 40             | C19               |               | Electron transfer flavoprotein-ubiquinone oxidoreductase, mitochondrial OS=Rattus norvegicus GN=Etfl        | ETFD_RAT      | 68.156           | 7.3        | 12        | 322           | 100                   | 276             | 100               |
| 43             | C20               |               | Tripartite motif-containing protein 72 OS=Rattus norvegicus GN=Trm72 PE=2 SV=1                              | TRF2_RAT      | 52.798           | 5.9        | 24        | 821           | 100                   | 649             | 100               |
| 50             | C21               |               | Fibrinogen gamma chain OS=Rattus norvegicus GN=Fgg PE=1 SV=3                                                | FIBG_RAT      | 50.601           | 5.6        | 11        | 296           | 100                   | 243             | 100               |
| 52             | C22               |               | Aldehyde dehydrogenase, mitochondrial OS=Rattus norvegicus GN=Aldh3 PE=1 SV=1                               | ALDH3_RAT     | 56.453           | 6.6        | 23        | 707           | 100                   | 533             | 100               |
| 54             | C23               |               | Beta-enolase OS=Rattus norvegicus GN=Eno3 PE=1 SV=3                                                         | ENOB_RAT      | 46.984           | 7.1        | 19        | 676           | 100                   | 533             | 100               |
| 55             | C24               |               | Beta-enolase OS=Rattus norvegicus GN=Eno3 PE=1 SV=3                                                         | ENOB_RAT      | 46.984           | 7.1        | 20        | 830           | 100                   | 674             | 100               |
| 58             | D1                |               | NADH dehydrogenase (ubiquinone) 1 alpha subcomplex subunit 10, mitochondrial OS=Rattus norvegicus G         | NDUAA_RAT     | 40.468           | 7.6        | 22        | 1070          | 100                   | 876             | 100               |
| 59             | D2                |               | NADH dehydrogenase (ubiquinone) 1 alpha subcomplex subunit 10, mitochondrial OS=Rattus norvegicus G         | NDUAA_RAT     | 40.468           | 7.6        | 17        | 1060          | 100                   | 928             | 100               |
| 60             | D3                |               | Short-chain specific acyl-CoA dehydrogenase, mitochondrial OS=Rattus norvegicus GN=Acad6 PE=1 SV=2          | ACAD6_RAT     | 44.737           | 8.5        | 15        | 566           | 100                   | 467             | 100               |
| 61             | D4                |               | Short-chain specific acyl-CoA dehydrogenase, mitochondrial OS=Rattus norvegicus GN=Acad6 PE=1 SV=2          | ACAD6_RAT     | 44.737           | 8.5        | 18        | 1010          | 100                   | 866             | 100               |
| 62             | D5                |               | Isocitrate dehydrogenase (NAD) subunit beta, mitochondrial OS=Rattus norvegicus GN=Idh3B PE=1 SV=1          | IDH3B_RAT     | 42.327           | 8.9        | 14        | 488           | 100                   | 406             | 100               |
| 66             | D6                |               | Four and a half LIM domains protein 2 OS=Rattus norvegicus GN=Flh2 PE=1 SV=1                                | FLH2_RAT      | 32.065           | 7.3        | 20        | 390           | 100                   | 271             | 100               |
| 67             | D7                |               | Four and a half LIM domains protein 2 OS=Rattus norvegicus GN=Flh2 PE=1 SV=1                                | FLH2_RAT      | 32.065           | 7.3        | 23        | 526           | 100                   | 370             | 100               |
| 68             | D8                |               | Actin, alpha cardiac muscle 1 OS=Rattus norvegicus GN=Actc1 PE=1 SV=1                                       | ACTC_RAT      | 41.992           | 5.2        | 13        | 538           | 100                   | 456             | 100               |
| 69             | D9                |               | Prothrombin OS=Rattus norvegicus GN=F2 PE=1 SV=1                                                            | F2_RAT        | 29.802           | 5.6        | 10        | 665           | 100                   | 602             | 100               |
| 71             | D10               |               | Phenylalanine-tRNA ligase, mitochondrial OS=Rattus norvegicus GN=Far2 PE=2 SV=1                             | BYFM_RAT      | 55.130           | 7.8        | 4         | 39            | 9                     | 31              | 98                |
| 72             | D11               |               | Carbonic anhydrase 2 OS=Rattus norvegicus GN=Ca2 PE=1 SV=2                                                  | CAH2_RAT      | 29.096           | 6.9        | 13        | 602           | 100                   | 498             | 100               |
| 73             | D12               |               | Glyceroldehyde-3-phosphate dehydrogenase OS=Rattus norvegicus GN=Gapdh PE=1 SV=3                            | G3P_RAT       | 35.805           | 8.1        | 11        | 515           | 100                   | 445             | 100               |
| 75             | D13               |               | Electron transfer flavoprotein subunit beta OS=Rattus norvegicus GN=Etflb PE=2 SV=3                         | ETFB_RAT      | 27.870           | 7.6        | 6         | 453           | 100                   | 426             | 100               |
| 76             | D14               |               | L-lactate dehydrogenase B chain OS=Rattus norvegicus GN=Ldhb PE=1 SV=2                                      | LDHB_RAT      | 36.589           | 5.7        | 10        | 54            | 97                    | 100             | 100               |
| 78             | D15               |               | Myosin-6 OS=Rattus norvegicus GN=Myh6 PE=2 SV=2                                                             | MYH6_RAT      | 223.370          | 5.6        | 24        | 365           | 100                   | 302             | 100               |
| 80             | D16               |               | ESI protein homolog, mitochondrial OS=Rattus norvegicus PE=1 SV=2                                           | ESI_RAT       | 26.155           | 9.1        | 11        | 763           | 100                   | 681             | 100               |
| 81             | D17               |               | Nitroacetate isomerase OS=Rattus norvegicus GN=Itai1 PE=1 SV=2                                              | IAAL_RAT      | 23.946           | 7.6        | 10        | 233           | 100                   | 161             | 100               |
| 83             | D18               |               | Apolipoprotein A1 OS=Rattus norvegicus GN=Apoa1 PE=1 SV=2                                                   | APOA1_RAT     | 30.043           | 5.5        | 19        | 468           | 100                   | 307             | 100               |
| 84             | D19               |               | ATP synthase subunit alpha, mitochondrial OS=Rattus norvegicus GN=Atpsa1 PE=1 SV=2                          | ATPA_RAT      | 59.717           | 9.2        | 10        | 517           | 100                   | 479             | 100               |
| 85             | D20               |               | Glutathione peroxidase 1 OS=Rattus norvegicus GN=Gpx1 PE=1 SV=4                                             | GPX1_RAT      | 22.282           | 7.7        | 7         | 257           | 100                   | 214             | 100               |
| 87             | D21               |               | Myosin regulatory light chain 2, ventricular/cardiac muscle isoform OS=Rattus norvegicus GN=Myo2 PE         | MLRV_RAT      | 18.868           | 4.9        | 13        | 500           | 100                   | 377             | 100               |
| 88             | D22               |               | Myosin light chain 3 OS=Rattus norvegicus GN=Myo3 PE=1 SV=2                                                 | MYL3_RAT      | 22.142           | 5.0        | 11        | 679           | 100                   | 605             | 100               |
| 89             | D23               |               | Eukaryotic translation initiation factor 5A-1 OS=Rattus norvegicus GN=EIF5a PE=1 SV=3                       | IF5A1_RAT     | 16.821           | 5.1        | 8         | 596           | 100                   | 501             | 100               |
| 90             | D24               |               | NADH dehydrogenase (ubiquinone) 1 alpha subcomplex assembly factor 3 OS=Rattus norvegicus GN=Nduaf          | NDUAF_RAT     | 20.883           | 7.7        | 6         | 175           | 100                   | 139             | 100               |
| 91             | E1                |               | Tubulin-specific chaperone A OS=Rattus norvegicus GN=Taca PE=1 SV=1                                         | TBCA_RAT      | 12.736           | 5.4        | 4         | 66            | 100                   | 53              | 100               |
| 93             | E2                |               | Transferrin OS=Rattus norvegicus GN=Tf PE=1 SV=1                                                            | TRFY_RAT      | 15.710           | 5.8        | 8         | 646           | 100                   | 580             | 100               |
| 96             | E3                |               | Myosin regulatory light chain 2, ventricular/cardiac muscle isoform OS=Rattus norvegicus GN=Myo2 PE         | MLRV_RAT      | 18.868           | 4.9        | 6         | 232           | 100                   | 194             | 100               |
| 97             | E4                |               | Nuclear transport factor 2 OS=Rattus norvegicus GN=Nuif2 PE=1 SV=1                                          | NTF2_RAT      | 14.469           | 5.1        | 5         | 84            | 100                   | 48              | 100               |
| 98             | E5                |               | ATP synthase-coupling factor 6, mitochondrial OS=Rattus norvegicus GN=Atps6 PE=1 SV=1                       | ATPS6_RAT     | 12.487           | 9.4        | 7         | 417           | 100                   | 355             | 100               |
| 99             | E6                |               | Hemoglobin subunit beta-1 OS=Rattus norvegicus GN=Hbb PE=1 SV=3                                             | HBB1_RAT      | 15.969           | 7.9        | 12        | 599           | 100                   | 484             | 100               |
| 100            | E7                |               | Hemoglobin subunit beta-1 OS=Rattus norvegicus GN=Hbb PE=1 SV=3                                             | HBB1_RAT      | 15.969           | 7.9        | 13        | 252           | 100                   | 124             | 100               |
| 101            | E8                |               | Hemoglobin subunit beta-1 OS=Rattus norvegicus GN=Hbb PE=1 SV=3                                             | HBB1_RAT      | 15.969           | 7.9        | 12        | 418           | 100                   | 252             | 100               |
| 102            | E9                |               | Hemoglobin subunit beta-1 OS=Rattus norvegicus GN=Hbb PE=1 SV=3                                             | HBB1_RAT      | 15.969           | 7.9        | 12        | 696           | 100                   | 579             | 100               |
| 103            | E10               |               | Hemoglobin subunit beta-1 OS=Rattus norvegicus GN=Hbb PE=1 SV=3                                             | HBB1_RAT      | 15.969           | 7.9        | 13        | 460           | 100                   | 331             | 100               |
| <b>Control</b> |                   |               |                                                                                                             |               |                  |            |           |               |                       |                 |                   |
| 1 fmol         | C18               |               | beta-D-galactosidase [Escherichia coli M39]                                                                 | g 18858747    | 116.583          | 5.2        | 22        | 445           | 100                   | 343             | 100               |
| 2 fmol         | C19               |               | beta-D-galactosidase [Escherichia coli M39]                                                                 | g 18858747    | 116.583          | 5.2        | 25        | 487           | 100                   | 359             | 100               |
| 5 fmol         | C20               |               | beta galactosidase small chain [Escherichia coli MG 107-1]                                                  | g 300817121   | 116.441          | 5.3        | 25        | 510           | 100                   | 381             | 100               |
| 10 fmol        | C21               |               | beta galactosidase small chain [Escherichia coli MG 107-1]                                                  | g 300817121   | 116.441          | 5.3        | 22        | 459           | 100                   | 357             | 100               |

high confidence  
low confidence  
no confidence

Supplementary Table 2. Within group fold changes and p-values for proteins.

| Assigned ID | Original No. | Appearance | SED Old / SED Young |           | EX Old / EX Young |           |
|-------------|--------------|------------|---------------------|-----------|-------------------|-----------|
|             |              |            | P value*            | Av. Ratio | P value*          | Av. Ratio |
| 1           | 30           | 48 (72)    | 0.7400              | -1.0      | 0.5800            | -1.2      |
| 2           | 46           | 66 (72)    | 0.9300              | 1.0       | 0.6000            | 1.1       |
| 3           | 95           | 63 (72)    | 0.0510              | -1.4      | 0.4600            | -1.3      |
| 5           | 109          | 69 (72)    | 0.0570              | 1.3       | 0.4100            | 1.1       |
| 6           | 108          | 66 (72)    | 0.1800              | 1.4       | 0.9700            | -1.1      |
| 7           | 132          | 66 (72)    | 0.4700              | 1.0       | 0.0120            | 1.2       |
| 9           | 195          | 66 (72)    | 0.0580              | 1.6       | 0.2600            | 1.1       |
| 13          | 255          | 72 (72)    | 0.0006              | -1.8      | 0.4800            | 1.1       |
| 15          | 274          | 69 (72)    | 0.0022              | -1.6      | 0.3600            | 1.1       |
| 19          | 346          | 69 (72)    | 0.8000              | -1.1      | 0.2300            | 1.2       |
| 23          | 385          | 48 (72)    | 0.0071              | 1.3       | 0.6100            | 1.1       |
| 26          | 424          | 39 (72)    | 0.5600              | 1.2       | 0.3000            | -1.5      |
| 27          | 428          | 72 (72)    | 0.0046              | -1.5      | 0.0170            | -1.6      |
| 28          | 437          | 72 (72)    | 0.0083              | -1.5      | 0.0450            | -1.5      |
| 29          | 429          | 72 (72)    | 0.7600              | -1.1      | 0.4100            | 1.1       |
| 33          | 521          | 72 (72)    | 0.6200              | -1.1      | 0.3300            | -1.1      |
| 34          | 417          | 51 (72)    | 0.6000              | 1.2       | 0.6200            | 1.5       |
| 39          | 478          | 69 (72)    | 0.0200              | -1.9      | 0.0011            | -2.3      |
| 40          | 528          | 69 (72)    | 0.0012              | 2.3       | 0.0002            | 2.0       |
| 43          | 581          | 54 (72)    | 0.2500              | -1.2      | 0.0050            | -1.4      |
| 50          | 701          | 72 (72)    | 0.0160              | -1.4      | 0.6500            | 1.0       |
| 52          | 662          | 72 (72)    | 0.0550              | 2.2       | 0.1800            | 1.8       |
| 54          | 735          | 72 (72)    | 0.4200              | -1.1      | 0.1100            | -1.3      |
| 55          | 748          | 72 (72)    | 0.4800              | -1.1      | 0.1500            | -1.3      |
| 58          | 903          | 72 (72)    | 0.2200              | -2.4      | 0.0045            | 3.9       |
| 59          | 946          | 72 (72)    | 0.0800              | 1.7       | 0.0280            | -2.0      |
| 60          | 913          | 72 (72)    | 0.0001              | 2.2       | 0.0160            | 1.5       |
| 61          | 924          | 72 (72)    | 0.0017              | 2.0       | 0.1200            | 1.3       |
| 62          | 927          | 72 (72)    | 0.0084              | -1.7      | 0.6600            | -1.1      |
| 66          | 1112         | 72 (72)    | 0.3700              | -1.4      | 0.1600            | -1.6      |
| 67          | 1118         | 72 (72)    | 0.2200              | -1.6      | 0.0670            | -1.8      |
| 68          | 1257         | 69 (72)    | 0.9800              | -1.0      | 0.7100            | -1.1      |
| 69          | 1255         | 72 (72)    | 0.5500              | 1.1       | 0.9100            | -1.0      |
| 71          | 1279         | 72 (72)    | 0.2400              | -1.2      | 0.7700            | 1.1       |
| 72          | 1340         | 72 (72)    | 0.3600              | -1.3      | 0.1400            | -1.2      |
| 73          | 1285         | 72 (72)    | 0.7400              | -1.0      | 0.0610            | 1.7       |
| 75          | 1372         | 60 (72)    | 0.8800              | 1.0       | 0.1800            | -1.3      |

|     |      |         |        |      |        |      |
|-----|------|---------|--------|------|--------|------|
| 76  | 1360 | 72 (72) | 0.0004 | 1.7  | 0.0400 | 1.2  |
| 78  | 1387 | 72 (72) | 0.0240 | 1.4  | 0.7600 | -1.1 |
| 80  | 1431 | 72 (72) | 0.4200 | -1.2 | 0.4000 | 1.1  |
| 81  | 1459 | 72 (72) | 0.0280 | 1.3  | 0.0030 | 1.3  |
| 83  | 1484 | 72 (72) | 0.0036 | -1.9 | 0.1100 | -1.6 |
| 84  | 1534 | 69 (72) | 0.0073 | 1.2  | 0.1100 | 1.3  |
| 85  | 1531 | 66 (72) | 0.5500 | 1.1  | 0.0250 | 1.5  |
| 87  | 1634 | 72 (72) | 0.1600 | 1.5  | 0.9400 | -1.2 |
| 88  | 1707 | 72 (72) | 0.0068 | 2.0  | 0.0180 | 2.0  |
| 89  | 1891 | 72 (72) | 0.0041 | -1.4 | 0.6800 | 1.0  |
| 90  | 1939 | 72 (72) | 0.8300 | -1.1 | 0.4800 | -2.1 |
| 91  | 2010 | 72 (72) | 0.0910 | 1.3  | 0.2100 | -1.2 |
| 93  | 2109 | 72 (72) | 0.0080 | -1.6 | 0.2300 | -1.3 |
| 96  | 2191 | 45 (72) | 0.6000 | 1.0  | 0.0170 | 2.0  |
| 97  | 2229 | 51 (72) | 0.8200 | -1.1 | 0.7800 | -1.0 |
| 98  | 2260 | 27 (72) | 0.2400 | 1.2  | 0.5600 | 2.2  |
| 99  | 2178 | 72 (72) | 0.1500 | -1.6 | 0.0140 | -1.6 |
| 100 | 2183 | 72 (72) | 0.1300 | -1.7 | 0.0200 | -1.6 |
| 101 | 2141 | 72 (72) | 0.3100 | -1.4 | 0.0280 | -1.7 |
| 102 | 2152 | 66 (72) | 0.4500 | -1.4 | 0.0073 | -1.9 |
| 103 | 2150 | 60 (72) | 0.3000 | -1.4 | 0.0400 | -1.5 |

\*P value indicates  
< 0.05
